# Supplementary material for: Distinguishing the Dimensions of the Original Dysfunctional Attitude Scale in an Archival Clinical Sample
Source: Springer Nature journal article supplement (doi:10.1007/s10608-022-10333-w), 2022-10-11
Supplement: MOESM1 [file 23593590]

Table S1

Current DAS dimensions compared to Beck, et al. 1991.

1991 Subscale:

| 1991 Loading | Item | Current subscale or other disposition |
| --- | --- | --- |

Vulnerability

| 1.12 | 79. Whenever I take a chance or risk I am only looking for trouble. | **Negative Expectancy** |
| --- | --- | --- |
| 0.83 | 37. Taking even a small risk is foolish because the loss is likely to be a disaster. | *Redundant with Item 79* |
| 0.80 | 89. People will reject you if they know your weaknesses. | **Negative Expectancy** |
| 0.77 | 76. If other people know what you are really like, they will think less of you. | *Redundant with Item 89* |
| 0.75 | 66. I cannot trust other people because they might be cruel to me. | **Negative Expectancy** |
| 0.71 | 57. If someone disagrees with me, it probably indicates he does not like me. | **Negative Expectancy** |
| 0.65 | 95. If a person I love does not love me, it means I am unlovable. | *Redundant with Item 88.* |
| 0.56 | 20. People should prepare for the worst or they will be disappointed. | *omitted* |
| 0.56 | 72. If you don’t have other people to lean on, you are bound to be sad. | *Redundant with Item 74* |
| 0.54 | 55. If I do well, it probably is due to chance; if I do badly, it is probably my own fault. | **Negative Expectancy** |
| 0.54 | 88. I am nothing if a person I love doesn't love me. | **Acceptability to others** |
| 0.51 | 42. If I make a foolish statement, it means I am a foolish person. | **Negative Expectancy** |
| 0.48 | 52. A person should think less of himself if other people do not accept him. | *omitted* |
| 0.48 | 85. Others can care for me even if they know all my weaknesses. | *Redundant with Item 89* |
| 0.46 | 80. If a person avoids problems, the problems tend to go away. | *omitted* |
| 0.42 | 19. If a person is indifferent to me, it means he does not like me. | *omitted* |

Need for Approval

| 0.73 | 48. I can enjoy myself even when others do not like me. | *Redundant with Item 50* |
| --- | --- | --- |
| 0.68 | 50. I do not need other people’s approval for me to be happy. | *Redundant with Item 16* |
| 0.68 | 54. My value as a person depends greatly on what others think of me. | *Redundant with Item 67* |
| 0.62 | 36. If others dislike you, you cannot be happy. | *Redundant with Item 48* |
| 0.57 | 94. A person doesn't need to be well liked in order to be happy. | **Acceptability to Others** |
| 0.51 | 16. What other people think about me is very important. | *Redundant with Item 54* |
| 0.50 | 59. I cannot be happy unless most people I know admire me. | **Acceptability to Others** |

Success-Perfectionism

| 0.93 | 45. My life is wasted unless I am a success. | **High Standards** |
| --- | --- | --- |
| 0.78 | 49. If I don't set the highest standards for myself, I am likely to end up a second-rate person. | **High Standards** |
| 0.72 | 35. If a person is not a success, then his life is meaningless. | *Redundant with Item 45* |
| 0.70 | 47. If I fail at my work, then I am a failure as a person. | **High Standards** |
| 0.63 | 7. I must be a useful, productive, creative person or life has no purpose. | **High Standards** |
| 0.62 | 51. If I do not do well all the time, people will not respect me. | *Redundant with Item 2* |
| 0.59 | 98. If I am to be a worthwhile person, I must be truly outstanding in at least one major respect. | **High Standards** |
| 0.53 | 39. If I do not do as well as other people, it means I am an inferior human being. | *omitted* |
| 0.47 | 73. People will like me even if I am not successful. | *omitted* |
| 0.45 | 26. It is possible to gain another person's respect without being especially talented at anything. | *omitted* |
| 0.45 | 91. I can reach important goals without slave driving myself. | *omitted* |
| 0.44 | 33. People who have good ideas are more worthy than those who do not. | **High Standards** |
| 0.43 | 75. I should set higher standards for myself than other people. | *Redundant with Item 45* |
| 0.38 | 2. People will probably think less of me if I make a mistake. | *omitted* |

Need to Please Others

| 0.71 | 5. It is best to give up your own interests in order to please other people. | *Redundant with Item 23* |
| --- | --- | --- |
| 0.49 | 8. I can find greater enjoyment if I do things because I want to, rather than in order to please other people. | **Cognitive Flexibility** |
| 0.49 | 14. I can be happy even if I miss out on many of the good things in life. | *omitted* |
| 0.47 | 32. I can take responsibility only for what I do, not what other people do. | **Cognitive Flexibility** |
| 0.45 | 29. It is not necessary to stop myself from doing something for my own welfare simply because it might displease another. | *Redundant with Item 5* |

Imperatives

| 0.78 | 64. If I try hard enough I should be able to excel at anything I attempt. | **Imperatives** |
| --- | --- | --- |
| 0.65 | 10. I should be happy all the time. | **Imperatives** |
| 0.64 | 31. A person should try to be the best at everything he undertakes. | *Redundant with Item 56* |
| 0.58 | 99. I ought to be able to solve my problems quickly and without a great deal of effort. | **Imperatives** |
| 0.57 | 44. I should always have complete control over my feelings. | **Imperatives** |
| 0.55 | 56. A person should do well at everything he undertakes. | **Imperatives** |
| 0.55 | 100. To be a good, moral, worthwhile person, I must help everyone who needs it. | **Imperatives** |
| 0.54 | 23. I should be able to please everybody. | **Imperatives** |
| 0.48 | 90. A person should be able to control what happens to him. | **Imperatives** |

Need to Impress

| 0.96 | 86. I should try to impress people if I want them to like me. | *Redundant with Item 59* |
| --- | --- | --- |
| 0.94 | 81. I have to impress new acquaintances with my charm, intelligence, or wit or they won't like me. | *Redundant with Item 86* |
| 0.82 | 58. The way to get people to like you is to impress them with your personality. | *Redundant with Item 86* |
| 0.45 | 3. People who have the marks of success (good looks, fame, wealth) are bound to be happier than people who do not. | *omitted* |

Avoidance of Appearing Weak

| 0.83 | 97. If a person asks for help, it is a sign of weakness. | *Redundant with Item 11* |
| --- | --- | --- |
| 0.68 | 11. Turning to someone else for advice or help is an admission of weaknesses. | *Redundant with Item 28* |
| 0.51 | 28. It is shameful for a person to display his weaknesses. | **Negative Expectancy** |
| 0.44 | 38. It is not necessary to become frustrated if one finds obstacles to getting what one wants. | *omitted* |

Control Over Emotions

| 0.45 | 84. No one can hurt me with words. I hurt myself by the way I choose to react to their words. | **Cognitive Flexibility** |
| --- | --- | --- |
| 0.44 | 25. Even though a person may not be able to control what happens to him, he can control how he thinks. | **Cognitive Flexibility** |
| 0.39 | 6. Criticism need not upset the person who receives the criticism. | *omitted* |

Disapproval-Dependence

| 0.69 | 46. If people whom I care about do not care for me, it is awful. | **Acceptability to others** |
| --- | --- | --- |
| 0.65 | 71. It is awful to be disapproved of by people important to you. | *Redundant with Item 46* |
| 0.41 | 12. If people consider me unattractive it need not upset me. | **Acceptability to others** |
| 0.45 | 1. I can find happiness without being loved by another person. | **Acceptability to others** |

Items deleted by Beck et al., 1991

| 4. There is no value in getting upset about making mistakes. | *omitted* |
| --- | --- |
| 9. By controlling the way I interpret situations, I can control my emotions. | *Redundant with Item 25* |
| 13. If you cannot do something well, there is little point in doing it at all. | **High Standards** |
| 15. If someone performs a selfish act, this means he is a selfish person. | *omitted* |
| 17. An unpleasant event does not make me sad. I make myself sad by what I tell myself. | **Cognitive Flexibility** |
| 18. If I ask a question, it makes me look inferior. | **Negative Expectancy** |
| 21. Happiness is more a matter of my attitude towards myself than the way other people feel about me. | *Redundant with Item 60* |
| 22. People should have a reasonable likelihood of success before undertaking anything. | **High Standards** |
| 24. If I demand perfection in myself, I will make myself very unhappy. | **Cognitive Flexibility** |
| 27. You can be a happy person without going out of your way in order to please other people. | *Redundant with Item 8* |
| 30. If a person has to be alone for a long period of time, it follows that he has to feel lonely. | *Redundant with Item 96* |
| 34. Just because I believe I deserve something, I have no reason to expect that I will get it. | *omitted* |
| 40. I may be able to influence other people's behaviour but I cannot control it. | **Cognitive Flexibility** |
| 41. I should be upset if I make a mistake. | *Redundant with Item 4* |
| 43. A person cannot change his emotional reactions even if he knows they are harmful to him. | **Cognitive Flexibility** |
| 53. One should look for a practical solution to problems rather than a perfect solution. | **Cognitive Flexibility** |
| 60. My own opinions of myself are more important than other's opinions of me. | **Cognitive Flexibility** |
| 61. If I do not treat people kindly, fairly and considerately, I am a rotten person | *omitted* |
| 62. People should be criticized for making mistakes. | *Redundant with Item 83* |
| 63. It is possible for a person to be scolded and not get upset. | *Redundant with Item 6* |
| 65. It is difficult to be happy unless one is good looking, intelligent, rich and creative. | *Redundant with Item 3* |
| 67. I don’t need the approval of other people in order to be happy. | **Acceptability to others** |
| 68. It is necessary to have the help in order to cope with life’s problems. | *Redundant with Item 74* |
| 69. It is not possible for a person to accomplish everything he wants. | *omitted* |
| 70. There’s no value in criticizing myself for my mistakes. | *Redundant with Item 83* |
| 74. A person cannot survive without the help of other people. | **Acceptability to others** |
| 77. Making mistakes is fine because I can learn from them. | *omitted* |
| 78. If I put other people's needs before my own, they should help me when I want them to do something for me. | *omitted* |
| 82. People can learn to be completely independent. | *omitted* |
| 83. People should be criticized for their mistakes. | *Redundant with Item 4* |
| 87. If I fail partly, it is as bad as being a complete failure. | *omitted* |
| 92. My happiness depends more on other people than it does on me. | *Redundant with Item 60* |
| 93. One can got pleasure from an activity regardless of the end result. | *omitted* |
| 96. Being isolated from others is bound to lead to unhappiness. | *Redundant with Item 74* |

Note. The disposition of “omitted” is given for items that were eliminated in the course of structural stability analyses.
